# Supplementary material for: The anomeric effect: the dominance of exchange effects in closed-shell systems
Source: Royal Society of Chemistry journal article supplement (doi:10.1039/c2ob26818c), 2012-11-03
Supplement: c2ob26818c.pdf [file c2ob26818c.pdf]

# The anomeric effect: the dominance of exchange effects in closed-shell systems

*Glauco F. Bauerfeldt<sup>†</sup>, Thiago M. Cardozo<sup>‡</sup>, Márcio S. Pereira<sup>†</sup>, Clarissa O da Silva<sup>†\*</sup>*  
\* e-mail: clarissa-dq@ufrj.br

<sup>†</sup>Dep. Química, Universidade Federal Rural do Rio de Janeiro, Rodovia BR 465, km 47,  
Seropédica – RJ . BRAZIL, 23890-000

<sup>‡</sup>Instituto de Química da UFRJ, CT, bloco A, sala 409 – Cidade Universitária, Ilha do  
Fundão, Rio de Janeiro, RJ. BRAZIL, 21949-900

## Supplementary Information

### Table of Contents:

|                                                                                                              | page |
|--------------------------------------------------------------------------------------------------------------|------|
| 1. Table with HF/6-31G(d,p) energy values for Cy derivatives                                                 | 2    |
| 2. Table with HF/6-31G(d,p) energy values for THP derivatives                                                | 3    |
| 3. Geometric and energetic data for Cy derivatives                                                           | 4    |
| 4. Geometric and energetic data for 2-THP derivatives                                                        | 20   |
| 5. Linear correlation for $\Delta K$ and $\Delta E_{\text{tot}}$ in (A and E) rotameric families of 2-OH-THP | 36   |
| 6. K and the anomeric effect (MP2 results)                                                                   | 37   |
| 7. Influence on the basis set type on the anomeric effect calculations                                       | 38   |
| 8. Absolute values for C5-O5, O5-C1 and C1-X bond lengths in 2-F-, 2-CN- and 2-OH-THP compounds              | 39   |

**1. HF/6-31G(d,p) energy values for Cy derivatives ( in hartree):**

|           | T           | VNe          | V <sub>NN</sub> | J          | K          | Total E     |
|-----------|-------------|--------------|-----------------|------------|------------|-------------|
| OH(A)60°  | 308.8302233 | -1395.406967 | 336.39016       | 484.922227 | -43.818822 | -309.083176 |
| OH(A)180° | 308.830720  | -1395.411089 | 336.391529      | 484.924574 | -43.818903 | -309.083170 |
| OH(A)300° | 308.829729  | -1393.783899 | 335.724277      | 483.966850 | -43.817880 | -309.080923 |
| OH(E)60°  | 308.834809  | -1384.455152 | 331.034971      | 479.317994 | -43.815907 | -309.083285 |
| OH(E)180° | 308.840521  | -1385.107591 | 331.306050      | 479.696312 | -43.818894 | -309.083602 |
| OH(E)300° | 308.840423  | -1385.108103 | 331.306646      | 479.696316 | -43.818884 | -309.083603 |

|                         |            |              |            |            |            |             |
|-------------------------|------------|--------------|------------|------------|------------|-------------|
| NH <sub>2</sub> (A)60°  | 289.067852 | -1345.474030 | 335.663211 | 474.036288 | -42.546606 | -289.253285 |
| NH <sub>2</sub> (A)180° | 289.068155 | -1344.113254 | 335.103572 | 473.235389 | -42.544976 | -289.251114 |
| NH <sub>2</sub> (A)300° | 289.068242 | -1344.111410 | 335.102230 | 473.234821 | -42.544998 | -289.251114 |
| NH <sub>2</sub> (E)60°  | 289.075172 | -1335.624585 | 330.850603 | 468.988502 | -42.543824 | -289.254132 |
| NH <sub>2</sub> (E)180° | 289.075135 | -1336.372663 | 331.190074 | 469.398832 | -42.545771 | -289.254394 |
| NH <sub>2</sub> (E)300° | 289.075202 | -1335.620545 | 330.848468 | 468.986574 | -42.543819 | -289.254121 |

|      |            |              |            |            |            |             |
|------|------------|--------------|------------|------------|------------|-------------|
| F(A) | 332.819077 | -1452.501538 | 335.289892 | 496.607439 | -45.296007 | -333.081137 |
| F(E) | 332.829392 | -1441.305605 | 329.763831 | 490.927842 | -45.296280 | -333.080820 |

|       |            |              |            |            |            |             |
|-------|------------|--------------|------------|------------|------------|-------------|
| CN(A) | 325.702998 | -1497.217530 | 369.141114 | 523.360301 | -46.946482 | -325.959599 |
| CN(E) | 325.702702 | -1483.425649 | 362.308241 | 516.400135 | -46.945707 | -325.960278 |

## 2. HF/6-31G(d,p) energy values for 2-THP derivatives (in hartree):

|           | T          | $V_{Ne}$     | $V_{NN}$   | J          | K          | Total E     |
|-----------|------------|--------------|------------|------------|------------|-------------|
| OH(A)60°  | 344.499740 | -1496.705584 | 343.622847 | 509.850804 | -46.171375 | -344.903569 |
| OH(A)180° | 344.491551 | -1497.032698 | 343.801634 | 510.010898 | -46.168604 | -344.897219 |
| OH(A)300° | 344.490410 | -1495.371999 | 343.120616 | 509.031222 | -46.167320 | -344.897072 |
| OH(E)60°  | 344.505304 | -1487.172800 | 338.982073 | 504.952535 | -46.167661 | -344.900548 |
| OH(E)180° | 344.501091 | -1487.296553 | 339.017169 | 505.048346 | -46.164153 | -344.894099 |
| OH(E)300° | 344.505707 | -1487.738078 | 339.220729 | 505.279079 | -46.169034 | -344.901596 |

|                         |            |              |            |            |            |             |
|-------------------------|------------|--------------|------------|------------|------------|-------------|
| NH <sub>2</sub> (A)60°  | 324.737123 | -1446.274151 | 342.603147 | 498.763056 | -44.897215 | -325.068040 |
| NH <sub>2</sub> (A)180° | 324.730202 | -1444.710893 | 341.997765 | 497.813697 | -44.891422 | -325.060651 |
| NH <sub>2</sub> (A)300° | 324.734973 | -1444.742694 | 341.962448 | 497.873243 | -44.896642 | -325.068673 |
| NH <sub>2</sub> (E)60°  | 324.739703 | -1437.374766 | 338.291768 | 494.168709 | -44.890685 | -325.065270 |
| NH <sub>2</sub> (E)180° | 324.740406 | -1437.933187 | 338.527685 | 494.491289 | -44.892712 | -325.066520 |
| NH <sub>2</sub> (E)300° | 324.746132 | -1437.604909 | 338.369152 | 494.311910 | -44.895366 | -325.073080 |

|      |            |              |            |            |            |             |
|------|------------|--------------|------------|------------|------------|-------------|
| F(A) | 368.477376 | -1554.328332 | 342.856451 | 521.741345 | -47.645838 | -368.898999 |
| F(E) | 368.482768 | -1544.325443 | 337.951589 | 516.638205 | -47.641424 | -368.894305 |

|       |            |              |            |            |            |             |
|-------|------------|--------------|------------|------------|------------|-------------|
| CN(A) | 361.356993 | -1597.422499 | 375.872199 | 547.716332 | -49.285431 | -361.762406 |
| CN(E) | 361.355745 | -1584.587723 | 369.506841 | 541.247797 | -49.283982 | -361.761322 |

### 3. Geometric and energetic data for Cy derivatives

F\_axial(Cy) HF 6-31g\*\*

| atom | angstroms     |               |               |
|------|---------------|---------------|---------------|
|      | x             | y             | z             |
| C1   | 0.2250606595  | 1.3211450920  | -0.5323278344 |
| C2   | -0.9952049454 | 1.1622313121  | 0.3801135671  |
| C3   | -1.7377606354 | -0.1475154770 | 0.0974864619  |
| C4   | -0.7989541370 | -1.3529391515 | 0.2092975676  |
| C5   | 1.1478455715  | 0.1148481200  | -0.4553953518 |
| H6   | -2.5717978068 | -0.2591600595 | 0.7849387350  |
| H7   | -0.6666014794 | 1.1749895456  | 1.4157653925  |
| H8   | -1.6620371752 | 2.0101202405  | 0.2508260976  |
| H9   | -0.0963559203 | 1.4374400122  | -1.5658601929 |
| H10  | 0.7866064158  | 2.2126078692  | -0.2699179380 |
| H11  | -0.4605161715 | -1.4534667309 | 1.2369428132  |
| H12  | -1.3283446969 | -2.2686268086 | -0.0389437277 |
| H13  | -2.1638320901 | -0.1126436028 | -0.9051053963 |
| H15  | 1.9808224271  | 0.2265174167  | -1.1410240631 |
| F16  | 1.6917549577  | 0.0702153863  | 0.8174717875  |
| C16  | 0.4208397750  | -1.1973614411 | -0.7043620998 |
| H17  | 1.1156847112  | -2.0191621380 | -0.5599884940 |
| H18  | 0.1092272394  | -1.2201851376 | -1.7471836903 |

Energy components, in hartrees:

|                                   |                   |              |
|-----------------------------------|-------------------|--------------|
| (A) Nuclear repulsion.....        | 335.28989161011   |              |
| (E) Total one-electron terms..... | -1119.68246043921 |              |
| (F) Electron-nuclear.....         | -1452.50153793788 |              |
| (H) Kinetic.....                  | 332.81907749866   |              |
| (I) Total two-electron terms..... | 451.31143181271   |              |
| (J) Coulomb.....                  | 496.60743859137   |              |
| (K) Exchange.....                 | -45.29600677866   |              |
| (L) Electronic energy.....        | -668.37102862651  | (E+I)        |
| (M) -V/T.....                     | 2.00078739332     | (-(A+F+I)/H) |
| (N) Total energy.....             | -333.08113701639  | (A+L)        |

SCFE: SCF energy: HF -333.08113701639 hartrees iterations: 2

F\_equat (Cy) HF 6-31g\*\*

| atom | angstroms     |               |               |
|------|---------------|---------------|---------------|
|      | x             | y             | z             |
| C1   | 0.2063851007  | 1.2851187419  | -0.5631118616 |
| C2   | -1.0118665911 | 1.1363255437  | 0.3545404183  |
| C3   | -1.7588769145 | -0.1745776076 | 0.0861358089  |
| C4   | -0.8200964656 | -1.3815940224 | 0.1860641631  |
| C5   | 1.1229702996  | 0.0805597735  | -0.4409380145 |
| H6   | -2.5834184106 | -0.2843286458 | 0.7850808480  |
| H7   | -0.6866774557 | 1.1584063805  | 1.3939798434  |
| H8   | -1.6769342780 | 1.9844315566  | 0.2224191683  |
| H9   | -0.1140275110 | 1.3649220728  | -1.5996588040 |
| H10  | 0.7609649855  | 2.1890623410  | -0.3300074068 |
| H11  | -0.4842974560 | -1.4918513216 | 1.2164844565  |
| H12  | -1.3510638833 | -2.2952718539 | -0.0637359254 |
| H13  | -2.1961020040 | -0.1412220567 | -0.9106124458 |
| F14  | 2.1664513902  | 0.2200082385  | -1.3308525672 |
| H15  | 1.5627793434  | 0.0471897475  | 0.5522431527  |
| C16  | 0.3967231688  | -1.2210692143 | -0.7312461138 |
| H17  | 1.0838577182  | -2.0537690550 | -0.6154984739 |
| H18  | 0.0806257687  | -1.2093185302 | -1.7721880771 |

Energy components, in hartrees:

|                                   |                   |                |
|-----------------------------------|-------------------|----------------|
| (A) Nuclear repulsion.....        | 329.76383059416   |                |
| (E) Total one-electron terms..... | -1108.47621277264 |                |
| (F) Electron-nuclear.....         | -1441.30560493956 |                |
| (H) Kinetic.....                  | 332.82939216692   |                |
| (I) Total two-electron terms..... | 445.63156199641   |                |
| (J) Coulomb.....                  | 490.92784186306   |                |
| (K) Exchange.....                 | -45.29627986665   |                |
| (L) Electronic energy.....        | -662.84465077623  | (E+I)          |
| (M) -V/T.....                     | 2.00075542612     | (- (A+F+I) /H) |
| (N) Total energy.....             | -333.08082018207  | (A+L)          |

SCFE: SCF energy: HF -333.08082018207 hartrees iterations: 2

O\_axial approximately 60° (Cy) HF 6-31g\*\*  
angstroms

| atom | x             | y             | z             |
|------|---------------|---------------|---------------|
| C1   | 0.2344312627  | 1.3247779805  | -0.5049482749 |
| C2   | -1.0003097313 | 1.1789806458  | 0.3894539640  |
| C3   | -1.7556333848 | -0.1197065270 | 0.0913473731  |
| C4   | -0.8334889808 | -1.3374715438 | 0.2048324071  |
| C5   | 1.1571207404  | 0.1129751462  | -0.4120800717 |
| H6   | -2.5990624172 | -0.2264285909 | 0.7685738309  |
| H7   | -0.6883362208 | 1.1864001420  | 1.4296499646  |
| H8   | -1.6561197239 | 2.0344071455  | 0.2490413445  |
| H9   | -0.0755428199 | 1.4408181460  | -1.5423061172 |
| H10  | 0.7964507290  | 2.2137257334  | -0.2361737849 |
| H11  | -0.5114336232 | -1.4492118913 | 1.2366488687  |
| H12  | -1.3721405342 | -2.2441581036 | -0.0583534718 |
| H13  | -2.1696547156 | -0.0745718320 | -0.9160043707 |
| H14  | 1.9580626184  | 0.2226742576  | -1.1431342782 |
| O15  | 1.7082483359  | 0.1122950924  | 0.8861558346  |
| H16  | 2.3000383636  | -0.6158625529 | 0.9805509467  |
| C17  | 0.3971591204  | -1.1856685877 | -0.6939662100 |
| H18  | 1.0667826916  | -2.0356882643 | -0.5679432543 |
| H19  | 0.0924212399  | -1.1881466097 | -1.7393626210 |

Energy components, in hartrees:

|                                   |                   |              |
|-----------------------------------|-------------------|--------------|
| (A) Nuclear repulsion.....        | 336.39016321171   |              |
| (E) Total one-electron terms..... | -1086.57674358463 |              |
| (F) Electron-nuclear.....         | -1395.40696689886 |              |
| (H) Kinetic.....                  | 308.83022331423   |              |
| (I) Total two-electron terms..... | 441.10340485459   |              |
| (J) Coulomb.....                  | 484.92222686402   |              |
| (K) Exchange.....                 | -43.81882200943   |              |
| (L) Electronic energy.....        | -645.47333873004  | (E+I)        |
| (M) -V/T.....                     | 2.00081906557     | (-(A+F+I)/H) |
| (N) Total energy.....             | -309.08317551833  | (A+L)        |

SCFE: SCF energy: HF -309.08317551833 hartrees iterations: 2

| O_axial_ approximately 180° (Cy) | HF 6-31g**<br>angstroms |               |               |
|----------------------------------|-------------------------|---------------|---------------|
| atom                             | x                       | y             | z             |
| C1                               | 2.3725895787            | 0.2851192619  | -1.4014915755 |
| C2                               | 3.1053450599            | 1.6183884524  | -1.2257900096 |
| C3                               | 2.1388155634            | 2.8007987063  | -1.3423689203 |
| C4                               | 0.9747149185            | 2.6664048568  | -0.3560125773 |
| C5                               | 1.2008063819            | 0.1412563546  | -0.4269836653 |
| H6                               | 2.6689508272            | 3.7340702652  | -1.1710749883 |
| H7                               | 3.5818911723            | 1.6388360849  | -0.2493902749 |
| H8                               | 3.8968348441            | 1.7039059478  | -1.9658882045 |
| H9                               | 1.9890752689            | 0.2066757327  | -2.4176140685 |
| H10                              | 3.0622201068            | -0.5477444359 | -1.2690348826 |
| H11                              | 1.3504908106            | 2.7381953756  | 0.6603725700  |
| H12                              | 0.2718104549            | 3.4842162114  | -0.4926730244 |
| H13                              | 1.7482463351            | 2.8473453157  | -2.3590023922 |
| H14                              | 0.6528091490            | -0.7712934439 | -0.6613675932 |
| O15                              | 1.6497130914            | 0.0848811290  | 0.9088481865  |
| H16                              | 2.2300143353            | -0.6502647467 | 1.0190549866  |
| C17                              | 0.2483398673            | 1.3290656411  | -0.5282898107 |
| H18                              | -0.5292561623           | 1.2186690983  | 0.2210429604  |
| H19                              | -0.2363206890           | 1.2976266984  | -1.5028513030 |

Energy components, in hartrees:

|                                   |                   |              |
|-----------------------------------|-------------------|--------------|
| (A) Nuclear repulsion.....        | 336.39152903533   |              |
| (E) Total one-electron terms..... | -1086.58036941061 |              |
| (F) Electron-nuclear.....         | -1395.41108943630 |              |
| (H) Kinetic.....                  | 308.83072002569   |              |
| (I) Total two-electron terms..... | 441.10567050013   |              |
| (J) Coulomb.....                  | 484.92457367867   |              |
| (K) Exchange.....                 | -43.81890317854   |              |
| (L) Electronic energy.....        | -645.47469891047  | (E+I)        |
| (M) -V/T.....                     | 2.00081743762     | (-(A+F+I)/H) |
| (N) Total energy.....             | -309.08316987514  | (A+L)        |

SCFE: SCF energy: HF -309.08316987514 hartrees iterations: 2

O\_axial\_ approximately 300° HF(Cy) 6-31g\*\*

|      | angstroms     |               |               |
|------|---------------|---------------|---------------|
| atom | x             | y             | z             |
| C1   | 0.4408692024  | -1.1027373482 | -0.9095414018 |
| C2   | 1.3101226850  | -2.3628208663 | -0.9983294664 |
| C3   | 2.5539650443  | -2.1246155131 | -1.8606321985 |
| C4   | 3.3580914985  | -0.9206089348 | -1.3594624785 |
| C5   | 1.2277584130  | 0.1180433437  | -0.4234593984 |
| H6   | 3.1780395570  | -3.0142311292 | -1.8747799223 |
| H7   | 1.6149904054  | -2.6742500749 | 0.0006964805  |
| H8   | 0.7253603153  | -3.1854782031 | -1.3999258670 |
| H9   | 0.0347723919  | -0.8825632997 | -1.8955290425 |
| H10  | -0.4022223544 | -1.2655408649 | -0.2451010150 |
| H11  | 3.7823873748  | -1.1489836920 | -0.3817418631 |
| H12  | 4.2049846258  | -0.7344833244 | -2.0137618955 |
| H13  | 2.2454248545  | -1.9440811953 | -2.8896498924 |
| H14  | 0.5963327084  | 0.9956952475  | -0.4995502095 |
| O15  | 1.5337641976  | 0.0261492359  | 0.9493843306  |
| H16  | 2.0947638629  | -0.7129074628 | 1.1133020438  |
| C17  | 2.4855517885  | 0.3372119460  | -1.2694973485 |
| H18  | 3.0503422500  | 1.1656676931  | -0.8529312190 |
| H19  | 2.1808157736  | 0.6290063827  | -2.2732104000 |

Energy components, in hartrees:

|                                   |                   |              |
|-----------------------------------|-------------------|--------------|
| (A) Nuclear repulsion.....        | 335.72427716563   |              |
| (E) Total one-electron terms..... | -1084.95417045645 |              |
| (F) Electron-nuclear.....         | -1393.78389939668 |              |
| (H) Kinetic.....                  | 308.82972894024   |              |
| (I) Total two-electron terms..... | 440.14896979685   |              |
| (J) Coulomb.....                  | 483.96684996376   |              |
| (K) Exchange.....                 | -43.81788016691   |              |
| (L) Electronic energy.....        | -644.80520065960  | (E+I)        |
| (M) -V/T.....                     | 2.00081337556     | (-(A+F+I)/H) |
| (N) Total energy.....             | -309.08092349397  | (A+L)        |

SCFE: SCF energy: HF -309.08092349397 hartrees iterations: 2



```
O_equat_ approximately 60° (Cy)      HF      6-31g**
                                     angstroms
atom      x              y              z
C1         0.4791768379   -1.2286157401   -0.3566163066
C2        -0.9836965395   -1.4589231903    0.0371626975
C3        -1.1544590435   -1.5003281507    1.5590538966
C4        -0.5821404769   -0.2404520438    2.2164792970
C5         1.0473041887    0.0302250590    0.2975849420
H6        -2.2047907378   -1.6119534123    1.8150431861
H7        -1.5965173932   -0.6562016483   -0.3715472578
H8        -1.3468030106   -2.3808867087   -0.4084463266
H9         1.0773354276   -2.0868289598   -0.0446525795
H10        0.5827758946   -1.1484955775   -1.4346400130
H11       -1.1749662277    0.6227791895    1.9159330347
H12       -0.6637549765   -0.3087189138    3.2977198766
H13        0.5109981872    0.8936998414   -0.0862874972
H14       -0.6425276857   -2.3769791748    1.9548773326
O15        2.3862642192    0.2462419728   -0.0702077859
H16        2.9176448259   -0.4686445552    0.2423471054
C17        0.8794685342   -0.0137928833    1.8159178849
H18        1.2604442798    0.9085273349    2.2442963314
H19        1.4932812266   -0.8242277634    2.2136875341
```

Energy components, in hartrees:

```
(A) Nuclear repulsion..... 331.03497091030
(E) Total one-electron terms.... -1075.62034262378
(F) Electron-nuclear..... -1384.45515204987
(H) Kinetic..... 308.83480942610
(I) Total two-electron terms.... 435.50208653123
(J) Coulomb..... 479.31799355063
(K) Exchange..... -43.81590701940
(L) Electronic energy..... -640.11825609255 (E+I)
(M) -V/T..... 2.00080455878 (- (A+F+I) /H)
(N) Total energy..... -309.08328518225 (A+L)
```

SCFE: SCF energy: HF -309.08328518225 hartrees iterations: 2

```
O_equat_ approximately 180° (Cy)   HF   6-31G**  
                                angstroms  
atom      x              y              z  
C1         0.7936817170    -0.1411096741    1.7743443400  
C2        -0.6908816528    -0.3515047292    2.0877140446  
C3        -1.5454104959     0.7822628739    1.5131831868  
C4        -1.2983239909     0.9571615593    0.0116835463  
C5         1.0333664091     0.0246509633    0.274395218  
H6        -2.5983619646     0.5885607993    1.7000604935  
H7        -1.0200797378    -1.2998208483    1.6642694123  
H8        -0.8356506016    -0.4267117570    3.1617898644  
H9         1.1589688545     0.7522405360    2.2769199109  
H10       1.3798502399    -0.9780563594    2.1517667798  
H11      -1.6615053723     0.0761980137    -0.5165587447  
H12      -1.8692037686     1.8001233915    -0.3673859117  
H13       0.7504605782    -0.9030561385    -0.2284025236  
H14      -1.3021083365     1.7107514797    2.0278621603  
O15       2.3784191694     0.3219443001    -0.0067565712  
H16       2.9301436569    -0.3811380992    0.2943943815  
C17       0.1891128930     1.1577876708    -0.2934314506  
H18       0.3591376149     1.2267254809    -1.3634568637  
H19       0.5377288872     2.0912975899    0.1433338700
```

Energy components, in hartrees:

```
(A) Nuclear repulsion..... 331.30605019964  
(E) Total one-electron terms..... -1076.26707020417  
(F) Electron-nuclear..... -1385.10759094104  
(H) Kinetic..... 308.84052073687  
(I) Total two-electron terms..... 435.87741783426  
(J) Coulomb..... 479.69631155476  
(K) Exchange..... -43.81889372050  
(L) Electronic energy..... -640.38965236991 (E+I)  
(M) -V/T..... 2.00078707753 (- (A+F+I) /H)  
(N) Total energy..... -309.08360217027 (A+L)
```

SCFE: SCF energy: HF -309.08360217027 hartrees iterations: 2

```
O_equat_ approximately 300° (Cy)      HF      6-31G**
                                     angstroms
atom      x      y      z
C1      0.1651539634      1.1339698850      -0.2868233747
C2     -1.3255947450      0.7992045307      -0.1795304808
C3     -1.6579405075     -0.5188697381     -0.8855170098
C4     -0.7811270174     -1.6624629387     -0.3667470970
C5      1.0320597035     -0.0036563644      0.2360599737
H6     -2.7085065123     -0.7622930366     -0.7505838227
H7     -1.6059803232      0.7241667105      0.8706027635
H8     -1.9161749349      1.6091259426     -0.5983689293
H9      0.4340418219      1.3143764994     -1.3255319669
H10     0.3988667603      2.0409968727      0.2620854367
H11    -1.0304653354     -1.8626093777      0.6747614188
H12    -0.9896363024     -2.5769788859     -0.9148726715
H13     0.8327375556     -0.1283137642      1.3029340232
H14    -1.4989310289     -0.4027473670     -1.9566886423
O15     2.3740220455      0.3708811983      0.0478635289
H16     2.9430827653     -0.2961220272      0.3952777858
C17     0.7066914385     -1.3151890965     -0.4772216825
H18     1.3123449890     -2.1206547612     -0.0637534745
H19     0.9898966940     -1.2120030746     -1.5228060198
```

Energy components, in hartrees:

```
(A) Nuclear repulsion..... 331.30664563721
(E) Total one-electron terms.... -1076.26767995411
(F) Electron-nuclear..... -1385.10810259095
(H) Kinetic..... 308.84042263684
(I) Total two-electron terms.... 435.87743138887
(J) Coulomb..... 479.69631557779
(K) Exchange..... -43.81888418891
(L) Electronic energy..... -640.39024856523 (E+I)
(M) -V/T..... 2.00078739787 (- (A+F+I) /H)
(N) Total energy..... -309.08360292802 (A+L)
```

SCFE: SCF energy: HF -309.08360292802 hartrees iterations: 2

```
NH2_axial_ approximately 60° (Cy)  HF  6-31G**
                                angstroms
atom      x      y      z
C1      2.2267101665  0.1922160733  -1.6008982102
C2      2.8835870117  1.5728343722  -1.6902214896
C3      1.8344324900  2.6761561780  -1.8539396842
C4      0.7911140650  2.6214928052  -0.7343223027
C5      1.1711296062  0.1109940638  -0.4913961881
H6      2.3157587511  3.6506936361  -1.8694111283
H7      3.4606950127  1.7556495833  -0.7891203907
H8      3.5802233277  1.5918395659  -2.5249299426
H9      1.7458680932  -0.0428064960  -2.5491825566
H10     2.9824389353  -0.5752367919  -1.4426322596
H11     1.2670855311  2.8551619868   0.2129512839
H12     0.0241241679  3.3741525823  -0.9005028184
H13     1.3365931126  2.5605273161  -2.8168717233
H14     0.6448074163  -0.8412361734  -0.5988483853
H15     1.1503085199  0.1504010083   1.5503348720
H16     2.4836326143  -0.5184614799   0.9410121677
N17     1.8208092939  0.2201259546   0.8104335596
C18     0.1420085102  1.2369964323  -0.6482895807
H19     -0.5653712097  1.2030268785   0.1785093858
H20     -0.4350625913  1.0500210146  -1.5525646803
```

Energy components, in hartrees:

```
(A) Nuclear repulsion..... 335.66321105192
(E) Total one-electron terms..... -1056.40617796355
(F) Electron-nuclear..... -1345.47402966495
(H) Kinetic..... 289.06785170140
(I) Total two-electron terms..... 431.48968183707
(J) Coulomb..... 474.03628805244
(K) Exchange..... -42.54660621537
(L) Electronic energy..... -624.91649612647 (E+I)
(M) -V/T..... 2.00064148736 (- (A+F+I) /H)
(N) Total energy..... -289.25328507456 (A+L)
```

SCFE: SCF energy: HF -289.25328507456 hartrees iterations: 2

```
NH2_axial_ approximately 180° (Cy)  HF  6-31G**
                                angstroms
atom      x              y              z
C1         0.4652822080    -1.2636479341    -0.6885987673
C2         1.4103636850    -2.4699160992    -0.7165459970
C3         2.5134225563    -2.2881654109    -1.7638786092
C4         3.2764394304    -0.9770212762    -1.5501045961
C5         1.2087469976     0.0673687517    -0.4722910714
H6         3.1986126261    -3.1315862257    -1.7386141087
H7         1.8626656725    -2.6084721190     0.2644849332
H8         0.8459994433    -3.3763191009    -0.9185307677
H9        -0.0712201195    -1.2144768455    -1.6354330514
H10       -0.2875788831    -1.3919660285     0.0867101093
H11       3.8434035958    -1.0328399767    -0.6221426360
H12       4.0092086739    -0.8377279968    -2.3404015712
H13       2.0643585581    -2.2818690145    -2.7564550663
H14       0.4992952798     0.8768893034    -0.6210408804
H15       1.0157619018     0.2281443683     1.5526565712
H16       2.3975922226    -0.4697265500     1.1151260694
N17       1.7484547592     0.2505361862     0.8712569001
C18       2.3252633066     0.2250853509    -1.5124018481
H19       2.8735436630     1.1378924693    -1.3046240588
H20       1.8691747154     0.3385055453    -2.4945880031
```

Energy components, in hartrees:

```
(A) Nuclear repulsion..... 335.10357244731
(E) Total one-electron terms..... -1055.04509939468
(F) Electron-nuclear..... -1344.11325424638
(H) Kinetic..... 289.06815485170
(I) Total two-electron terms..... 430.69041248648
(J) Coulomb..... 473.23538863128
(K) Exchange..... -42.54497614480
(L) Electronic energy..... -624.35468690820 (E+I)
(M) -V/T..... 2.00063292897 (- (A+F+I) /H)
(N) Total energy..... -289.25111446089 (A+L)
```

SCFE: SCF energy: HF -289.25111446089 hartrees iterations: 2

```
NH2_axial_ approximately 300° (Cy)  HF  6-31G**
                                angstroms
atom      x              y              z
C1         0.2077745852    1.3170222643    -0.5283757044
C2        -1.0138531396    1.1843238366     0.3887584614
C3        -1.7755958223    -0.1177187555     0.1215716164
C4        -0.8530024987    -1.3361977829     0.2255492023
C5         1.1480563422     0.1078377112    -0.4445447958
H6        -2.6081382655    -0.2162717549     0.8134104492
H7        -0.7020554405     1.2163902965     1.4315552558
H8        -1.6711346583     2.0379594319     0.2466667111
H9        -0.1380374625     1.4154610052    -1.5561502356
H10       0.7672954097     2.2152452969    -0.2893975021
H11      -0.5244401038    -1.4538178620     1.2572487824
H12      -1.3985491815    -2.2428830923    -0.0217804954
H13      -2.2052464691    -0.0808671273    -0.8789019829
H14       1.8911078776     0.2095543613    -1.2308786128
H15       1.2896705462     0.0184036857     1.6033445697
H16       2.5649368451    -0.5997795186     0.8420561883
N17       1.8892953590     0.1379482264     0.8122892180
C18       0.3637395942    -1.1933491705    -0.6954446982
H19       1.0271476865    -2.0482165772    -0.5795063234
H20       0.0249198178    -1.2030874420    -1.7307460909
```

Energy components, in hartrees:

```
(A) Nuclear repulsion..... 335.10223001748
(E) Total one-electron terms..... -1055.04316770723
(F) Electron-nuclear..... -1344.11140955714
(H) Kinetic..... 289.06824184991
(I) Total two-electron terms..... 430.68982352116
(J) Coulomb..... 473.23482114647
(K) Exchange..... -42.54499762531
(L) Electronic energy..... -624.35334418607 (E+I)
(M) -V/T..... 2.00063262681 (- (A+F+I) /H)
(N) Total energy..... -289.25111416859 (A+L)
```

SCFE: SCF energy: HF -289.25111416859 hartrees iterations: 2

```
NH2_equat_ approximately 60° (Cy)   HF   6-31G**  
angstroms  
atom      x      y      z  
C1      0.4420736631  -1.2213694069  -0.3653244927  
C2     -1.0387962141  -1.4145786905  -0.0245998586  
C3     -1.2618146791  -1.4409478053   1.4898353264  
C4     -0.6834802753  -0.1896914258   2.1564703468  
C5      1.0275837553   0.0354309303   0.2943281279  
H6     -2.3223716962  -1.5280066006   1.7113808002  
H7     -1.6171349173  -0.5996244782  -0.4586404624  
H8     -1.4093016450  -2.3308788861  -0.4766130669  
H9      1.0082565839  -2.0902733043  -0.0268978939  
H10     0.5753758332  -1.1644628447  -1.4441727432  
H11    -1.2479234983   0.6832297056   1.8304807708  
H12    -0.8036209135  -0.2492178045   3.2349469304  
H13    -0.7824926438  -2.3255775942   1.9078543008  
H14     0.5012626627   0.9009107136  -0.1062305749  
H15     2.9844224475  -0.5278700386   0.3524337997  
H16     2.6103222598   0.3312036173  -0.9579574934  
N17     2.4421884749   0.2489252192   0.0256057617  
C18     0.7944723106   0.0060776889   1.8060462242  
H19     1.1755916999   0.9244765609   2.2407435541  
H20     1.3778518752  -0.8097925967   2.2356093486
```

Energy components, in hartrees:

```
(A) Nuclear repulsion..... 330.85060278447  
(E) Total one-electron terms..... -1046.54941307782  
(F) Electron-nuclear..... -1335.62458524585  
(H) Kinetic..... 289.07517216803  
(I) Total two-electron terms..... 426.44467872163  
(J) Coulomb..... 468.98850237259  
(K) Exchange..... -42.54382365096  
(L) Electronic energy..... -620.10473435619 (E+I)  
(M) -V/T..... 2.00061907566 (- (A+F+I) /H)  
(N) Total energy..... -289.25413157173 (A+L)
```

SCFE: SCF energy: HF -289.25413157173 hartrees iterations: 2

```
NH2_equat_ approximately 180° (Cy)  HF  6-31G**
                                angstroms
atom      x              y              z
C1         0.9144930138   -0.1067079302   1.8475691039
C2        -0.5365819752   -0.2844239232   2.3030377677
C3        -1.4275833122    0.8464276458   1.7812177128
C4        -1.3197633349    0.9804265622   0.2595619106
C5         1.0218714680    0.0128134897   0.3264430349
H6        -2.4610792126    0.6737293805   2.0704159575
H7        -0.9170849033   -1.2384853139   1.9397083536
H8        -0.5811526855   -0.3274692402   3.3880092533
H9         1.3381883623    0.7919036632   2.2907371356
H10        1.5191854054   -0.9429398765   2.1944699412
H11       -1.7410044207    0.0922041572   -0.2101430118
H12       -1.9127421096    1.8229445979   -0.0861626944
H13       -1.1255165826    1.7841106998   2.2458269547
H14        0.6463970632   -0.9207843966   -0.1075996183
H15        3.0006552770   -0.4768744785   0.2617042759
H16        2.5017679564    0.3275177212   -1.0412515943
N17        2.4059504863    0.2673772467   -0.0464045481
C18        0.1360150689    1.1506765435   -0.1836254749
H19        0.1915852406    1.2016038357   -1.2697154985
H20        0.5349544501    2.0891520005   0.1952192892
```

Energy components, in hartrees:

```
(A) Nuclear repulsion..... 331.19007350479
(E) Total one-electron terms..... -1047.29752843985
(F) Electron-nuclear..... -1336.37266328984
(H) Kinetic..... 289.07513484999
(I) Total two-electron terms..... 426.85306129307
(J) Coulomb..... 469.39883213899
(K) Exchange..... -42.54577084592
(L) Electronic energy..... -620.44446714678 (E+I)
(M) -V/T..... 2.00062011142 (- (A+F+I) /H)
(N) Total energy..... -289.25439364199 (A+L)
```

SCFE: SCF energy: HF -289.25439364199 hartrees iterations: 2



```
NH2_equat_ approximately 300° (Cy)  HF  6-31G**
                                angstroms
atom      x              y              z
C1         0.2450697980    1.2829547590    -0.1344182971
C2        -1.2354074113    1.1929549798     0.2471091393
C3        -1.8777152788    -0.0937958270    -0.2785026286
C4        -1.0992624197    -1.3291190524     0.1818778964
C5         1.0321198865     0.0533818586     0.3230141321
H6        -2.9118959468    -0.1582450885     0.0497475000
H7        -1.3284427489     1.2223944403     1.3321594847
H8        -1.7688402410     2.0608080243    -0.1315255471
H9         0.3331372370     1.3731738048    -1.2182028243
H10        0.6995400817     2.1721331829     0.2904286381
H11       -1.1814429579    -1.4226158155     1.2642449744
H12       -1.5372064651    -2.2299755186    -0.2398561474
H13       -1.8975468440    -0.0672879730    -1.3675221852
H14        0.9981806138     0.0232619230     1.4113371436
H15        2.9783299868    -0.5568021882     0.2982263960
H16        2.5357421400     0.2212604059    -1.0411048697
N17        2.4319999198     0.2090521361    -0.0444396682
C18        0.3792893101    -1.2315024173    -0.2064744392
H19        0.9233562268    -2.0983530748     0.1642819672
H20        0.4704801808    -1.2480497784    -1.2934310847
```

Energy components, in hartrees:

```
(A) Nuclear repulsion..... 330.84846800774
(E) Total one-electron terms..... -1046.54534310055
(F) Electron-nuclear..... -1335.62054521709
(H) Kinetic..... 289.07520211655
(I) Total two-electron terms..... 426.44275451975
(J) Coulomb..... 468.98657369073
(K) Exchange..... -42.54381917098
(L) Electronic energy..... -620.10258858079 (E+I)
(M) -V/T..... 2.00061893395 (- (A+F+I) /H)
(N) Total energy..... -289.25412057305 (A+L)
```

SCFE: SCF energy: HF -289.25412057305 hartrees iterations: 2

| CN(axial) (Cy) | HF            | 6-31G**       | angstroms     |  |  |
|----------------|---------------|---------------|---------------|--|--|
| atom           | x             | y             | z             |  |  |
| C1             | 0.1976004282  | 1.3238696170  | -0.5214969883 |  |  |
| C2             | -1.0357313736 | 1.1614046471  | 0.3712005067  |  |  |
| C3             | -1.7728300862 | -0.1486922064 | 0.0768444031  |  |  |
| C4             | -0.8393796348 | -1.3568293352 | 0.1998855577  |  |  |
| C5             | 1.1465809412  | 0.1131922675  | -0.4273728112 |  |  |
| H6             | -2.6160467287 | -0.2603543927 | 0.7522117861  |  |  |
| H7             | -0.7327036576 | 1.1822507262  | 1.4156260182  |  |  |
| H8             | -1.7002752236 | 2.0077479620  | 0.2236417827  |  |  |
| H9             | -0.1130832039 | 1.4112947714  | -1.5600543921 |  |  |
| H10            | 0.7339653071  | 2.2338349997  | -0.2730161388 |  |  |
| H11            | -0.5254363850 | -1.4708070786 | 1.2350365236  |  |  |
| H12            | -1.3669438025 | -2.2680014827 | -0.0667979056 |  |  |
| H13            | -2.1837381563 | -0.1122651481 | -0.9315154180 |  |  |
| H15            | 1.9406595696  | 0.2250976240  | -1.1589454940 |  |  |
| C16            | 0.3942952636  | -1.2051878599 | -0.6942681226 |  |  |
| H17            | 1.0669654611  | -2.0469199951 | -0.5661759194 |  |  |
| H18            | 0.0891521320  | -1.1978580896 | -1.7380864308 |  |  |
| C18            | 1.8139013583  | 0.0754686761  | 0.8921640643  |  |  |
| N19            | 2.3240354878  | 0.0473250510  | 1.9065449967  |  |  |

Energy components, in hartrees:

|     |                               |                   |                |
|-----|-------------------------------|-------------------|----------------|
| (A) | Nuclear repulsion.....        | 369.14111449502   |                |
| (E) | Total one-electron terms..... | -1171.51453222366 |                |
| (F) | Electron-nuclear.....         | -1497.21753045220 |                |
| (H) | Kinetic.....                  | 325.70299822854   |                |
| (I) | Total two-electron terms..... | 476.41381841062   |                |
| (J) | Coulomb.....                  | 523.36030080326   |                |
| (K) | Exchange.....                 | -46.94648239264   |                |
| (L) | Electronic energy.....        | -695.10071381305  | (E+I)          |
| (M) | -V/T.....                     | 2.00078783766     | (- (A+F+I) /H) |
| (N) | Total energy.....             | -325.95959931803  | (A+L)          |

CN(equat) (Cy) HF 6-31G\*\*

| atom | angstroms     |               |               |
|------|---------------|---------------|---------------|
|      | x             | y             | z             |
| C1   | 0.1768771470  | 1.2715644968  | -0.5999783722 |
| C2   | -1.0133883650 | 1.1323325108  | 0.3522808049  |
| C3   | -1.7789910826 | -0.1719901688 | 0.1128332982  |
| C4   | -0.8527392899 | -1.3879576887 | 0.2044768091  |
| C5   | 1.1044312855  | 0.0473700923  | -0.4933184007 |
| H6   | -2.5887965785 | -0.2657260011 | 0.8306522996  |
| H7   | -0.6562892942 | 1.1590797493  | 1.3808402562  |
| H8   | -1.6749286852 | 1.9850354594  | 0.2318761731  |
| H9   | -0.1774476891 | 1.3565492496  | -1.6244919497 |
| H10  | 0.7357131611  | 2.1759635216  | -0.3823995039 |
| H11  | -0.4875739207 | -1.4889745686 | 1.2255741088  |
| H12  | -1.4019849402 | -2.2977049022 | -0.0192717898 |
| H13  | -2.2383959531 | -0.1433206974 | -0.8740682611 |
| H15  | 1.5255175880  | 0.0152347545  | 0.5087966022  |
| C16  | 0.3386633248  | -1.2636238756 | -0.7485662191 |
| H17  | 1.0093606699  | -2.1090959463 | -0.6333111014 |
| H18  | -0.0094969933 | -1.2725081858 | -1.7787732579 |
| C18  | 2.2454327217  | 0.1739474278  | -1.4201106438 |
| N19  | 3.1162544403  | 0.2689467156  | -2.1427551115 |

Energy components, in hartrees:

|                                   |                   |              |
|-----------------------------------|-------------------|--------------|
| (A) Nuclear repulsion.....        | 362.30824100755   |              |
| (E) Total one-electron terms..... | -1157.72294721448 |              |
| (F) Electron-nuclear.....         | -1483.42564941325 |              |
| (H) Kinetic.....                  | 325.70270219877   |              |
| (I) Total two-electron terms..... | 469.45442842294   |              |
| (J) Coulomb.....                  | 516.40013518955   |              |
| (K) Exchange.....                 | -46.94570676661   |              |
| (L) Electronic energy.....        | -688.26851879154  | (E+I)        |
| (M) -V/T.....                     | 2.00079083036     | (-(A+F+I)/H) |
| (N) Total energy.....             | -325.96027778399  | (A+L)        |

#### 4. Geometric and energetic data for 2-THP derivatives

```
F_axial(THP)      HF      6-31G**  
  
                    angstroms  
atom              x              y              z  
C1                0.2297411971      1.3039749822     -0.5285775670  
C2               -1.0018077314      1.1782180797      0.3716670206  
C3               -1.7121754324     -0.1479457732      0.0889415629  
C4               -0.7242479480     -1.3013192340      0.1929084732  
C5                1.0945847591      0.0608094205     -0.4356690026  
H6               -2.5310557364     -0.3079745048      0.7849947282  
H7               -0.6925166699      1.2127914258      1.4126722698  
H8               -1.6717322150      2.0167817504      0.2101778192  
H9               -0.0761001859      1.4145273306     -1.5655923563  
H10              0.8271622361      2.1706329904     -0.2659495690  
H11              -0.3865700668     -1.4265221859      1.2170388783  
H12              -1.1657935165     -2.2329747301     -0.1338780697  
H13              -2.1355748711     -0.1327956900     -0.9127210621  
O14              0.3944537065     -1.0953933052     -0.6488477665  
H15              1.9057151449      0.0682079199     -1.1494247847  
F16              1.6624725473      0.0262040564      0.8143455822  
  
Energy components, in hartrees:  
(A) Nuclear repulsion..... 342.85645063385  
(E) Total one-electron terms..... -1185.85095573152  
(F) Electron-nuclear..... -1554.32833206543  
(H) Kinetic..... 368.47737633391  
(I) Total two-electron terms..... 474.09550656154  
(J) Coulomb..... 521.74134457714  
(K) Exchange..... -47.64583801560  
(L) Electronic energy..... -711.75544916997 (E+I)  
(M) -V/T..... 2.00114422819 (- (A+F+I) /H)  
(N) Total energy..... -368.89899853613 (A+L)  
  
SCFE: SCF energy: HF      -368.89899853613 hartrees      iterations: 2
```

| F_equat (THP) | HF            | 6-31G**       | angstroms     |  |  |
|---------------|---------------|---------------|---------------|--|--|
| atom          | x             | y             | z             |  |  |
| C1            | 0.1743765961  | 1.1915605400  | -0.2371316753 |  |  |
| C2            | -1.3242157439 | 0.9121733982  | -0.0844448698 |  |  |
| C3            | -1.6762641939 | -0.4287890096 | -0.7348839182 |  |  |
| C4            | -0.7405334797 | -1.5175907491 | -0.2239829951 |  |  |
| C5            | 0.9692696671  | -0.0023805582 | 0.2478003438  |  |  |
| H6            | -2.7065803157 | -0.7033931153 | -0.5258827261 |  |  |
| H7            | -1.5827712305 | 0.8805897500  | 0.9732051179  |  |  |
| H8            | -1.9040605301 | 1.7180076634  | -0.5219536495 |  |  |
| H9            | 0.4287729536  | 1.3482544384  | -1.2813713520 |  |  |
| H10           | 0.4721005687  | 2.0768362275  | 0.3158859814  |  |  |
| H11           | -0.9241364787 | -1.7079329638 | 0.8345208785  |  |  |
| H12           | -0.8804069961 | -2.4477283790 | -0.7574020756 |  |  |
| H13           | 0.8636150525  | -0.1413148787 | 1.3231571464  |  |  |
| H14           | -1.5700445210 | -0.3534643875 | -1.8138821667 |  |  |
| O15           | 0.6059006663  | -1.1559463278 | -0.4144947283 |  |  |
| F16           | 2.2824795251  | 0.1862602768  | -0.0061055109 |  |  |

Energy components, in hartrees:

|                                   |                   |                |  |
|-----------------------------------|-------------------|----------------|--|
| (A) Nuclear repulsion.....        | 337.95158880418   |                |  |
| (E) Total one-electron terms..... | -1175.84267520449 |                |  |
| (F) Electron-nuclear.....         | -1544.32544271802 |                |  |
| (H) Kinetic.....                  | 368.48276751353   |                |  |
| (I) Total two-electron terms..... | 468.99678148828   |                |  |
| (J) Coulomb.....                  | 516.63820541607   |                |  |
| (K) Exchange.....                 | -47.64142392779   |                |  |
| (L) Electronic energy.....        | -706.84589371622  | (E+I)          |  |
| (M) -V/T.....                     | 2.00111684300     | (- (A+F+I) /H) |  |
| (N) Total energy.....             | -368.89430491203  | (A+L)          |  |

SCFE: SCF energy: HF -368.89430491203 hartrees iterations: 2

```
O_axial_ approximately 60° (THP)    HF    6-31g**  
angstroms  
atom      x      y      z  
C1      0.2261547382    1.2985656152    -0.5248604266  
C2     -1.0095321821    1.1726567923    0.3687846916  
C3     -1.7209026132   -0.1510794497    0.0787470317  
C4     -0.7369023297   -1.3074678035    0.1865967899  
C5      1.1035069171    0.0599815182   -0.4247051192  
H6     -2.5456330731   -0.3105586043    0.7686657098  
H7     -0.7073468972    1.2057767222    1.4114949760  
H8     -1.6784664456    2.0117902014    0.2021900059  
H9     -0.0800137198    1.4038128003   -1.5625840367  
H10     0.8163254452    2.1702619905   -0.2633115147  
H11    -0.4120516841   -1.4291246689    1.2164653399  
H12    -1.1850679796   -2.2381595256   -0.1372157470  
H13    -2.1370042571   -0.1332917725   -0.9261558784  
O14     0.3831377514   -1.1103224054   -0.6493971802  
H15     1.8637485032    0.0670855501   -1.1989151942  
O16     1.6995981723    0.0538961333    0.8333728219  
H17     2.2344514018   -0.7202917939    0.9130318704
```

Energy components, in hartrees:

```
(A) Nuclear repulsion..... 343.62284652278  
(E) Total one-electron terms..... -1152.20584457100  
(F) Electron-nuclear..... -1496.70558414102  
(H) Kinetic..... 344.49973957002  
(I) Total two-electron terms..... 463.67942912374  
(J) Coulomb..... 509.85080447713  
(K) Exchange..... -46.17137535339  
(L) Electronic energy..... -688.52641544726 (E+I)  
(M) -V/T..... 2.00117221962 (- (A+F+I) /H)  
(N) Total energy..... -344.90356892449 (A+L)
```

```
SCFE: SCF energy: HF -344.90356892449 hartrees iterations: 2
```

O\_axial\_ approximately 180° HF(THP) 6-31g\*\*

|      | angstroms    |               |               |
|------|--------------|---------------|---------------|
| atom | x            | y             | z             |
| C1   | 2.2788640412 | 0.1542184501  | -1.4570061155 |
| C2   | 3.0184555203 | 1.4897305653  | -1.3494251131 |
| C3   | 2.0111400599 | 2.6405035411  | -1.4171943274 |
| C4   | 0.9037363758 | 2.4292407500  | -0.3931532891 |
| C5   | 1.1405271820 | 0.0793051401  | -0.4411452260 |
| H6   | 2.4988337168 | 3.5948864354  | -1.2361330463 |
| H7   | 3.5558642534 | 1.5319616642  | -0.4060293431 |
| H8   | 3.7559821623 | 1.5770237440  | -2.1417922574 |
| H9   | 1.8478494927 | 0.0473186843  | -2.4493802706 |
| H10  | 2.9576710061 | -0.6839740262 | -1.3124074631 |
| H11  | 1.2909555916 | 2.5244101220  | 0.6159258713  |
| H12  | 0.1082866848 | 3.1519116689  | -0.5209112594 |
| H13  | 1.5711803425 | 2.6840660124  | -2.4110725261 |
| O14  | 0.2966002954 | 1.1648985887  | -0.5539116379 |
| H15  | 0.5195677364 | -0.7910833009 | -0.6298910413 |
| O16  | 1.6256381303 | 0.0408858282  | 0.8721759260  |
| H17  | 2.1573807179 | -0.7277739407 | 0.9970450733  |

Energy components, in hartrees:

|                                   |                   |              |
|-----------------------------------|-------------------|--------------|
| (A) Nuclear repulsion.....        | 343.80163438989   |              |
| (E) Total one-electron terms..... | -1152.54114714202 |              |
| (F) Electron-nuclear.....         | -1497.03269819221 |              |
| (H) Kinetic.....                  | 344.49155105019   |              |
| (I) Total two-electron terms..... | 463.84229349981   |              |
| (J) Coulomb.....                  | 510.01089777554   |              |
| (K) Exchange.....                 | -46.16860427573   |              |
| (L) Electronic energy.....        | -688.69885364221  | (E+I)        |
| (M) -V/T.....                     | 2.00117758535     | (-(A+F+I)/H) |
| (N) Total energy.....             | -344.89721925231  | (A+L)        |

SCFE: SCF energy: HF -344.89721925231 hartrees iterations: 2

O\_axial\_ approximately 300° HF(THP) 6-31g\*\*  
angstroms

| atom | x            | y             | z             |
|------|--------------|---------------|---------------|
| C1   | 0.7770850920 | -1.3082629319 | -0.9854200521 |
| C2   | 2.0024839170 | -2.2091109900 | -1.1799944683 |
| C3   | 3.0687015414 | -1.4658596821 | -1.9886314932 |
| C4   | 3.3467763279 | -0.1058003325 | -1.3600760281 |
| C5   | 1.1679165313 | 0.0613697771  | -0.4316459417 |
| H6   | 3.9883518842 | -2.0421885915 | -2.0458277584 |
| H7   | 2.4167770780 | -2.5049074032 | -0.2156502584 |
| H8   | 1.7134768249 | -3.1311387332 | -1.6742082244 |
| H9   | 0.2958201323 | -1.1521417220 | -1.9466809763 |
| H10  | 0.0480203017 | -1.7666449181 | -0.3245600469 |
| H11  | 3.8383889933 | -0.2245922287 | -0.3950925979 |
| H12  | 4.0021635193 | 0.4878430352  | -1.9838167730 |
| H13  | 2.7141490183 | -1.3162154596 | -3.0054058242 |
| O14  | 2.1659021086 | 0.6406147918  | -1.2139054768 |
| H15  | 0.3353038657 | 0.7464471957  | -0.4883260549 |
| O16  | 1.5148434632 | 0.0112111057  | 0.9143734647  |
| H17  | 2.0458168474 | -0.7433737963 | 1.1057086672  |

Energy components, in hartrees:

|                                   |                   |              |
|-----------------------------------|-------------------|--------------|
| (A) Nuclear repulsion.....        | 343.12061552984   |              |
| (E) Total one-electron terms..... | -1150.88158901927 |              |
| (F) Electron-nuclear.....         | -1495.37199891264 |              |
| (H) Kinetic.....                  | 344.49040989336   |              |
| (I) Total two-electron terms..... | 462.86390169202   |              |
| (J) Coulomb.....                  | 509.03122151106   |              |
| (K) Exchange.....                 | -46.16731981904   |              |
| (L) Electronic energy.....        | -688.01768732725  | (E+I)        |
| (M) -V/T.....                     | 2.00118047380     | (-(A+F+I)/H) |
| (N) Total energy.....             | -344.89707179742  | (A+L)        |

SCFE: SCF energy: HF -344.89707179742 hartrees iterations: 2



```
O_equat_ approximately 60° (THP)    HF    6-31g**
                                     angstroms
atom      x            y            z
C1        0.1624008630   -0.8682581618   -0.6168779122
C2       -1.2542218322   -1.0314567875   -0.0585881696
C3       -1.1917072254   -1.4916336696    1.3997211714
C4       -0.2659269300   -0.5779311020    2.1928972706
C5        1.0018360783    0.0156059762    0.2968697817
H6       -2.1804699797   -1.4941470326    1.8509178716
H7       -1.7776263982   -0.0778059957   -0.1146006185
H8       -1.8219884019   -1.7333113843   -0.6613477716
H9        0.6483383071   -1.8403041942   -0.6849793720
H10      0.1486957199   -0.4388246232   -1.6136513636
H11     -0.6989913420    0.4205444721    2.2696318331
H12     -0.1083026514   -0.9477086375    3.1977423875
H13      0.6039930596    1.0288149430    0.3050827648
H14     -0.8087316238   -2.5081623459    1.4487773005
O15      1.0035411691   -0.4978518753    1.5966216662
O16      2.3102252049    0.1219415510   -0.1208706232
H17      2.7494195158   -0.6967991982    0.0508225306
```

Energy components, in hartrees:

```
(A) Nuclear repulsion..... 338.98207292205
(E) Total one-electron terms..... -1142.66749523129
(F) Electron-nuclear..... -1487.17279951366
(H) Kinetic..... 344.50530428237
(I) Total two-electron terms..... 458.78487390980
(J) Coulomb..... 504.95253461601
(K) Exchange..... -46.16766070621
(L) Electronic energy..... -683.88262132149 (E+I)
(M) -V/T..... 2.00114728021 (- (A+F+I) /H)
(N) Total energy..... -344.90054839944 (A+L)
```

```
SCFE: SCF energy: HF -344.90054839944 hartrees iterations: 2
```

O\_equat\_ approximately 180° HF(THP) 6-31g\*\*  
angstroms

| atom | x             | y             | z             |
|------|---------------|---------------|---------------|
| C1   | 0.8075617673  | -0.1345486583 | 1.7924854496  |
| C2   | -0.6794796707 | -0.1615690502 | 2.1570203068  |
| C3   | -1.3906177272 | 1.0365570427  | 1.5235121499  |
| C4   | -1.0666789372 | 1.1048406155  | 0.0362358482  |
| C5   | 0.9855455958  | 0.0070270647  | 0.2855192117  |
| H6   | -2.4664244123 | 0.9695583765  | 1.6630890460  |
| H7   | -1.1287541422 | -1.0839322184 | 1.7905520808  |
| H8   | -0.8060335416 | -0.1609083357 | 3.2350802362  |
| H9   | 1.2988391869  | 0.7155319228  | 2.2571725735  |
| H10  | 1.3072962322  | -1.0367218078 | 2.1397473277  |
| H11  | -1.5097966856 | 0.2536050187  | -0.4839736778 |
| H12  | -1.4585431690 | 2.0075264589  | -0.4135502507 |
| H13  | 0.5864908799  | -0.8807342275 | -0.2176069349 |
| H14  | -1.0557610572 | 1.9556562345  | 1.9975528577  |
| O15  | 0.3192284192  | 1.1280926680  | -0.1824551207 |
| O16  | 2.3099496126  | 0.2021077733  | -0.0714605995 |
| H17  | 2.8015408764  | -0.5853154025 | 0.0932728838  |

Energy components, in hartrees:

|     |                               |                   |              |
|-----|-------------------------------|-------------------|--------------|
| (A) | Nuclear repulsion.....        | 339.01716918115   |              |
| (E) | Total one-electron terms..... | -1142.79546228386 |              |
| (F) | Electron-nuclear.....         | -1487.29655318729 |              |
| (H) | Kinetic.....                  | 344.50109090343   |              |
| (I) | Total two-electron terms..... | 458.88419373387   |              |
| (J) | Coulomb.....                  | 505.04834631119   |              |
| (K) | Exchange.....                 | -46.16415257732   |              |
| (L) | Electronic energy.....        | -683.91126854999  | (E+I)        |
| (M) | -V/T.....                     | 2.00114080471     | (-(A+F+I)/H) |
| (N) | Total energy.....             | -344.89409936884  | (A+L)        |

SCFE: SCF energy: HF -344.89409936884 hartrees iterations: 2

O\_equat\_ approximately 300° HF(THP) 6-31g\*\*  
angstroms

| atom | x             | y             | z             |
|------|---------------|---------------|---------------|
| C1   | 0.1743205760  | 1.1877483475  | -0.2343967802 |
| C2   | -1.3237265936 | 0.9074901480  | -0.0829196214 |
| C3   | -1.6790373909 | -0.4325831526 | -0.7331857415 |
| C4   | -0.7494207433 | -1.5254092018 | -0.2202336546 |
| C5   | 0.9802441104  | -0.0035926664 | 0.2472613044  |
| H6   | -2.7117147787 | -0.7026607222 | -0.5280793968 |
| H7   | -1.5839434461 | 0.8757974090  | 0.9744119112  |
| H8   | -1.9044437451 | 1.7128231163  | -0.5214455032 |
| H9   | 0.4287524916  | 1.3512828739  | -1.2774151986 |
| H10  | 0.4697475478  | 2.0716832538  | 0.3217800430  |
| H11  | -0.9344173692 | -1.7095053331 | 0.8397078686  |
| H12  | -0.9016539121 | -2.4571652476 | -0.7493506155 |
| H13  | 0.8203010023  | -0.1536704901 | 1.3198614922  |
| H14  | -1.5686597298 | -0.3583722068 | -1.8120636899 |
| O15  | 0.5958318348  | -1.1729270727 | -0.4160871258 |
| O16  | 2.3132479427  | 0.2172163053  | -0.0157141067 |
| H17  | 2.7895435872  | -0.5838469828 | 0.1371396455  |

Energy components, in hartrees:

|                                   |                   |              |
|-----------------------------------|-------------------|--------------|
| (A) Nuclear repulsion.....        | 339.22072880473   |              |
| (E) Total one-electron terms..... | -1143.23237010431 |              |
| (F) Electron-nuclear.....         | -1487.73807758041 |              |
| (H) Kinetic.....                  | 344.50570747610   |              |
| (I) Total two-electron terms..... | 459.11004482440   |              |
| (J) Coulomb.....                  | 505.27907876030   |              |
| (K) Exchange.....                 | -46.16903393589   |              |
| (L) Electronic energy.....        | -684.12232527991  | (E+I)        |
| (M) -V/T.....                     | 2.00114915077     | (-(A+F+I)/H) |
| (N) Total energy.....             | -344.90159647518  | (A+L)        |

SCFE: SCF energy: HF -344.90159647518 hartrees iterations: 2

```
NH2_axial_ approximately 60° (THP)  HF  6-31g**
                                     angstroms
atom      x              y              z
C1        -4.3488513100  -0.8937150411  0.3572349047
C2        -4.2158023371  0.2163455110  -0.6876795819
C3        -3.6590086045  1.4788374353  -0.0257878182
C4        -2.3761507106  1.1539460915  0.7273893252
C5        -3.0446753335  -1.0939993634  1.1287334366
H6        -3.4616736197  2.2508109540  -0.7653527867
H7        -3.5457560146  -0.1052245817  -1.4790410489
H8        -5.1809407064  0.4174000344  -1.1441177000
H9        -5.1205639752  -0.6279032770  1.0752714893
H10       -4.6523865829  -1.8312252503  -0.1030343426
H11       -1.5892874319  0.8851731605  0.0299103274
H12       -2.0396866780  2.0030364764  1.3094360000
H13       -4.3894308306  1.8791636921  0.6740360788
O14       -2.5765147105  0.1122039173  1.6560089657
H15       -3.2399261922  -1.7072263661  2.0062818018
H16       -1.1877213220  -1.8190382853  0.7931166333
H17       -2.3238038482  -2.5469584069  -0.1045505578
N18       -2.0283639208  -1.6683975339  0.2713585172
```

Energy components, in hartrees:

```
(A) Nuclear repulsion..... 342.60314737127
(E) Total one-electron terms.... -1121.53702763296
(F) Electron-nuclear..... -1446.27415096366
(H) Kinetic..... 324.73712333070
(I) Total two-electron terms.... 453.86584068135
(J) Coulomb..... 498.76305569454
(K) Exchange..... -44.89721501319
(L) Electronic energy..... -667.67118695160 (E+I)
(M) -V/T..... 2.00101902809 (- (A+F+I) /H)
(N) Total energy..... -325.06803958034 (A+L)
```

SCFE: SCF energy: HF -325.06803958034 hartrees iterations: 2

NH2\_axial\_ approximately 180° (THP) HF 6-31g\*\*

| atom | x             | y             | z             |
|------|---------------|---------------|---------------|
| C1   | -3.4237254020 | -2.1080223897 | 2.3213927993  |
| C2   | -4.1994537029 | -3.3333063566 | 1.8324376632  |
| C3   | -5.3312443173 | -2.8861656568 | 0.9042188925  |
| C4   | -4.7818640476 | -1.9946706964 | -0.2015495975 |
| C5   | -2.9867325957 | -1.2218732709 | 1.1551697064  |
| H6   | -5.8350253148 | -3.7435325647 | 0.4648795702  |
| H7   | -3.5308081380 | -3.9996907396 | 1.2960001966  |
| H8   | -4.5951117888 | -3.8870740816 | 2.6792622011  |
| H9   | -4.0583348238 | -1.5098820463 | 2.9703421444  |
| H10  | -2.5560852495 | -2.4013258284 | 2.9081447505  |
| H11  | -4.1438034120 | -2.5693200400 | -0.8652025557 |
| H12  | -5.5830027491 | -1.5628299553 | -0.7887049208 |
| H13  | -6.0736987439 | -2.3297762728 | 1.4723926093  |
| O14  | -4.0680243538 | -0.9011231597 | 0.3296730702  |
| H15  | -2.6572826251 | -0.2596749457 | 1.5423335003  |
| H16  | -1.6489881127 | -1.2735831520 | -0.3611067614 |
| H17  | -1.1728557440 | -2.1241808792 | 0.9341768716  |
| N18  | -1.9623274269 | -1.8795846499 | 0.3709995221  |

Energy components, in hartrees:

|                                   |                   |              |
|-----------------------------------|-------------------|--------------|
| (A) Nuclear repulsion.....        | 342.59168840921   |              |
| (E) Total one-electron terms..... | -1121.51703234477 |              |
| (F) Electron-nuclear.....         | -1446.25207593061 |              |
| (H) Kinetic.....                  | 324.73504358584   |              |
| (I) Total two-electron terms..... | 453.85731403963   |              |
| (J) Coulomb.....                  | 498.75410536718   |              |
| (K) Exchange.....                 | -44.89679132755   |              |
| (L) Electronic energy.....        | -667.65971830514  | (E+I)        |
| (M) -V/T.....                     | 2.00102540923     | (-(A+F+I)/H) |
| (N) Total energy.....             | -325.06802989593  | (A+L)        |

SCFE: SCF energy: HF -325.06802989593 hartrees iterations: 2

```
NH2_axial_ approximately 300° (THP) HF 6-31g**
                                angstroms
atom      x              y              z
C1        -2.8554735235    0.2498668565    1.7099425069
C2        -1.9370730846    0.2320422894    2.9364121149
C3        -2.4257909172    -0.8214279782    3.9328983221
C4        -2.5947782878    -2.1633931984    3.2321349528
C5        -3.0420269308    -1.1459343856    1.1139951177
H6        -1.7341393707    -0.9248443267    4.7651884618
H7        -0.9125203849    0.0099750692    2.6413735419
H8        -1.9129223354    1.2151284936    3.3967275802
H9        -3.8333871638    0.6145278719    2.0123139951
H10       -2.4776568553    0.9168243414    0.9429727513
H11       -1.6203374223    -2.5571257900    2.9405231249
H12       -3.0510913916    -2.8932400895    3.8892303398
H13       -3.3856212017    -0.5170082635    4.3432560291
O14       -3.4377431226    -2.0609046217    2.1160468949
H15       -3.8797263753    -1.1360880760    0.4296693162
H16       -1.0439137258    -1.5324331282    0.8917808198
H17       -2.0111804491    -2.4811415629    0.0056869619
N18       -1.8891200534    -1.5537688209    0.3597684057
```

Energy components, in hartrees:

```
(A) Nuclear repulsion..... 341.96244761751
(E) Total one-electron terms..... -1120.00772084121
(F) Electron-nuclear..... -1444.74269385901
(H) Kinetic..... 324.73497301780
(I) Total two-electron terms..... 452.97660060706
(J) Coulomb..... 497.87324250872
(K) Exchange..... -44.89664190166
(L) Electronic energy..... -667.03112023415 (E+I)
(M) -V/T..... 2.00102760598 (- (A+F+I) /H)
(N) Total energy..... -325.06867261664 (A+L)
```

SCFE: SCF energy: HF -325.06867261664 hartrees iterations: 2

```
NH2_equat_ approximately 60° (THP)  HF  6-31g**
                                     angstroms
atom      x              y              z
C1        -4.5132559518  -0.8386358999  0.3180277152
C2        -4.2635429230  0.2668532297  -0.7119211508
C3        -3.7006861034  1.5075445879  -0.0155409927
C4        -2.5106830659  1.1195497801  0.8532216924
C5        -3.2622493323  -1.0911472991  1.1640149430
H6        -3.3981376962  2.2589049787  -0.7404252864
H7        -3.5494194118  -0.0855349501  -1.4551932902
H8        -5.1779118074  0.5048702836  -1.2470014053
H9        -5.3212318698  -0.5459356080  0.9863191284
H10       -4.8141724375  -1.7616444610  -0.1726758819
H11       -1.6796080469  0.7935538422  0.2253897644
H12       -2.1666286980  1.9567867193  1.4471045042
H13       -4.4656654449  1.9533959719  0.6156081201
O14       -2.8470277838  0.1040735458  1.7592655984
H15       -2.4688817947  -1.4672022277  0.5146435337
H16       -4.1037868278  -1.6929739126  2.8922880294
H17       -3.7404309247  -2.9182135456  1.8913454912
N18       -3.4269936030  -2.0338872737  2.2380494031
```

Energy components, in hartrees:

```
(A) Nuclear repulsion..... 338.29176847692
(E) Total one-electron terms..... -1112.63506259127
(F) Electron-nuclear..... -1437.37476571929
(H) Kinetic..... 324.73970312802
(I) Total two-electron terms..... 449.27802401664
(J) Coulomb..... 494.16870875738
(K) Exchange..... -44.89068474075
(L) Electronic energy..... -663.35703857464 (E+I)
(M) -V/T..... 2.00100254748 (- (A+F+I) /H)
(N) Total energy..... -325.06527009772 (A+L)
```

SCFE: SCF energy: HF -325.06527009772 hartrees iterations: 2

NH2\_equat\_ approximately 180° (THP) HF 6-31g\*\*  
angstroms

| atom | x             | y             | z             |
|------|---------------|---------------|---------------|
| C1   | -2.3805155234 | 0.0778378843  | 1.5420283622  |
| C2   | -2.0647985937 | 0.9512385116  | 0.3244212746  |
| C3   | -1.4986804937 | 0.0880912519  | -0.8063803397 |
| C4   | -2.4147628208 | -1.1018328047 | -1.0651232958 |
| C5   | -3.2436710579 | -1.1097549799 | 1.1336908972  |
| H6   | -1.3828442622 | 0.6682143362  | -1.7184016751 |
| H7   | -2.9739389958 | 1.4441300543  | -0.0179836765 |
| H8   | -1.3666339627 | 1.7381094875  | 0.5929493480  |
| H9   | -1.4666289647 | -0.3160688300 | 1.9759132462  |
| H10  | -2.8882501721 | 0.6572587794  | 2.3100162923  |
| H11  | -3.3679124292 | -0.7589130589 | -1.4725503420 |
| H12  | -1.9777647904 | -1.7875777331 | -1.7798025302 |
| H13  | -0.5154718511 | -0.2825008071 | -0.5279133690 |
| O14  | -2.6324355244 | -1.8382638152 | 0.1077105089  |
| H15  | -4.2011099810 | -0.7319172136 | 0.7498385984  |
| H16  | -3.9338406753 | -1.6095105355 | 2.9690125407  |
| H17  | -3.8997042762 | -2.8429426404 | 1.9159907800  |
| N18  | -3.4092245002 | -2.0285996361 | 2.2276964483  |

Energy components, in hartrees:

|                                   |                   |              |
|-----------------------------------|-------------------|--------------|
| (A) Nuclear repulsion.....        | 338.52768453360   |              |
| (E) Total one-electron terms..... | -1113.19278110678 |              |
| (F) Electron-nuclear.....         | -1437.93318734784 |              |
| (H) Kinetic.....                  | 324.74040624106   |              |
| (I) Total two-electron terms..... | 449.59857701197   |              |
| (J) Coulomb.....                  | 494.49128863479   |              |
| (K) Exchange.....                 | -44.89271162282   |              |
| (L) Electronic energy.....        | -663.59420409481  | (E+I)        |
| (M) -V/T.....                     | 2.00100422773     | (-(A+F+I)/H) |
| (N) Total energy.....             | -325.06651956122  | (A+L)        |

SCFE: SCF energy: HF -325.06651956122 hartrees iterations: 2



NH2\_equat\_ approximately 300° (THP) HF 6-31g\*\*  
angstroms

| atom | x             | y             | z             |
|------|---------------|---------------|---------------|
| C1   | -2.1952221368 | -1.6594233252 | 0.1909823292  |
| C2   | -2.1064171784 | -0.7933722407 | -1.0688110528 |
| C3   | -3.4916845132 | -0.6259818436 | -1.6971517535 |
| C4   | -4.4864476056 | -0.1582614409 | -0.6425675360 |
| C5   | -3.2693449056 | -1.1350773186 | 1.1362457085  |
| H6   | -3.4627130241 | 0.0846001862  | -2.5193884149 |
| H7   | -1.7095257342 | 0.1863462831  | -0.8055509895 |
| H8   | -1.4111744428 | -1.2294910636 | -1.7798748182 |
| H9   | -2.4516159915 | -2.6814397394 | -0.0834491876 |
| H10  | -1.2453093006 | -1.6909716220 | 0.7139801448  |
| H11  | -4.2351193909 | 0.8527316858  | -0.3147262631 |
| H12  | -5.4958853855 | -0.1352756758 | -1.0344869939 |
| H13  | -3.8306160416 | -1.5773457090 | -2.1004592077 |
| O14  | -4.5030440331 | -1.0271030377 | 0.4576415409  |
| H15  | -2.9861789183 | -0.1426517842 | 1.4886814636  |
| H16  | -4.1120312974 | -1.6155182776 | 2.8904357071  |
| H17  | -3.7078747125 | -2.8931521536 | 1.9935393303  |
| N18  | -3.4102966075 | -1.9798997881 | 2.2770678847  |

Energy components, in hartrees:

|                                   |                   |              |
|-----------------------------------|-------------------|--------------|
| (A) Nuclear repulsion.....        | 338.36915204106   |              |
| (E) Total one-electron terms..... | -1112.85877703669 |              |
| (F) Electron-nuclear.....         | -1437.60490924429 |              |
| (H) Kinetic.....                  | 324.74613220760   |              |
| (I) Total two-electron terms..... | 449.41654491842   |              |
| (J) Coulomb.....                  | 494.31191042595   |              |
| (K) Exchange.....                 | -44.89536550753   |              |
| (L) Electronic energy.....        | -663.44223211826  | (E+I)        |
| (M) -V/T.....                     | 2.00100677987     | (-(A+F+I)/H) |
| (N) Total energy.....             | -325.07308007721  | (A+L)        |

SCFE: SCF energy: HF -325.07308007721 hartrees iterations: 2

CN axial (THP) HF 6-31g\*\*

| atom | angstroms     |               |               |
|------|---------------|---------------|---------------|
|      | x             | y             | z             |
| C1   | 0.2021016861  | 1.3171693406  | -0.5242133848 |
| C2   | -1.0426068646 | 1.1869281327  | 0.3564613912  |
| C3   | -1.7442278284 | -0.1431857797 | 0.0691621767  |
| C4   | -0.7576337872 | -1.2960136361 | 0.1910307531  |
| C5   | 1.0845957482  | 0.0690299592  | -0.4170872951 |
| H6   | -2.5712919236 | -0.3007073475 | 0.7554963792  |
| H7   | -0.7572728293 | 1.2330893684  | 1.4049775862  |
| H8   | -1.7120577891 | 2.0215645553  | 0.1754688729  |
| H9   | -0.0927316943 | 1.4063865661  | -1.5656838905 |
| H10  | 0.7799877212  | 2.1992940687  | -0.2686168645 |
| H11  | -0.4311228222 | -1.4132116414 | 1.2224189049  |
| H12  | -1.1961807560 | -2.2309693315 | -0.1292972939 |
| H13  | -2.1538701376 | -0.1334327057 | -0.9378786182 |
| O14  | 0.3666082346  | -1.1004522216 | -0.6432275216 |
| H15  | 1.8611501409  | 0.0968635081  | -1.1702070496 |
| C16  | 1.7820456155  | 0.0175373355  | 0.9029379585  |
| N17  | 2.3124691823  | -0.0109260303 | 1.9058440805  |

Energy components, in hartrees:

|                                   |                   |                |
|-----------------------------------|-------------------|----------------|
| (A) Nuclear repulsion.....        | 375.87219865514   |                |
| (E) Total one-electron terms..... | -1236.06550599656 |                |
| (F) Electron-nuclear.....         | -1597.42249890551 |                |
| (H) Kinetic.....                  | 361.35699290895   |                |
| (I) Total two-electron terms..... | 498.43090094856   |                |
| (J) Coulomb.....                  | 547.71633234399   |                |
| (K) Exchange.....                 | -49.28543139543   |                |
| (L) Electronic energy.....        | -737.63460504800  | (E+I)          |
| (M) -V/T.....                     | 2.00112191958     | (- (A+F+I) /H) |
| (N) Total energy.....             | -361.76240639286  | (A+L)          |

CN equat (THP) HF 6-31g\*\*

| atom | angstroms     |               |               |
|------|---------------|---------------|---------------|
|      | x             | y             | z             |
| C1   | 0.1535511119  | 1.2065720809  | -0.2543023328 |
| C2   | -1.3389575452 | 0.9118251884  | -0.0817613977 |
| C3   | -1.6918582267 | -0.4286895682 | -0.7320242354 |
| C4   | -0.7566047601 | -1.5196356111 | -0.2285717298 |
| C5   | 0.9667346803  | 0.0017417392  | 0.2264051043  |
| H6   | -2.7210360793 | -0.7031844659 | -0.5185786881 |
| H7   | -1.5813852394 | 0.8772647816  | 0.9793218010  |
| H8   | -1.9286232639 | 1.7147776311  | -0.5115263844 |
| H9   | 0.3834367121  | 1.3800240743  | -1.3010289319 |
| H10  | 0.4476973885  | 2.0917867569  | 0.3003026698  |
| H11  | -0.9259883169 | -1.7074916065 | 0.8323251384  |
| H12  | -0.9040814691 | -2.4491707184 | -0.7608431970 |
| H13  | 0.8366234767  | -0.1192742807 | 1.3018663646  |
| H14  | -1.5916998993 | -0.3517043487 | -1.8114296508 |
| O15  | 0.5919253264  | -1.1672464447 | -0.4340959216 |
| C16  | 2.4136084541  | 0.1982199737  | -0.0110846996 |
| N17  | 3.5201403845  | 0.3821977421  | -0.1784832677 |

Energy components, in hartrees:

|     |                               |                   |              |
|-----|-------------------------------|-------------------|--------------|
| (A) | Nuclear repulsion.....        | 369.50684074829   |              |
| (E) | Total one-electron terms..... | -1223.23197806183 |              |
| (F) | Electron-nuclear.....         | -1584.58772322373 |              |
| (H) | Kinetic.....                  | 361.35574516189   |              |
| (I) | Total two-electron terms..... | 491.96381505752   |              |
| (J) | Coulomb.....                  | 541.24779703975   |              |
| (K) | Exchange.....                 | -49.28398198223   |              |
| (L) | Electronic energy.....        | -731.26816300432  | (E+I)        |
| (M) | -V/T.....                     | 2.00112237622     | (-(A+F+I)/H) |
| (N) | Total energy.....             | -361.76132225602  | (A+L)        |

## 5. Linear correlation for $\Delta K$ and $\Delta E_{\text{tot}}$ in (A and E) rotameric families of 2-OH-THP

Linear correlation between  $\Delta E_{\text{tot}}$  and  $\Delta K$ , for rotameric family of axial and equatorial anomers of 2-OH THP. The reference is the corresponding absolute values for 2-OH THP rotamer of A anomer with  $\varphi=55.5^\circ$ .

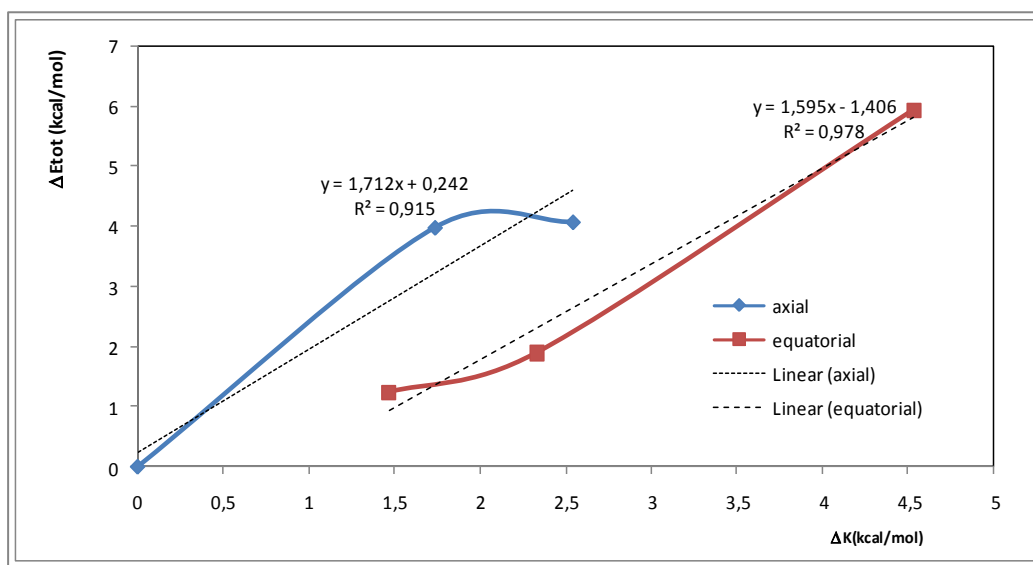

## 6. K and the anomeric effect (MP2 results)

All quantities are in kcal/mol

| Ax - Eq           | F-THP |       | CN-THP |       | OH-THP |       | NH2-THP |       |
|-------------------|-------|-------|--------|-------|--------|-------|---------|-------|
|                   | HF    | MP2   | HF     | MP2   | HF     | MP2   | HF      | MP2   |
| T                 | -3,15 | -1,09 | 0,94   | 8,10  | -3,72  | -4,22 | -6,88   | -5,65 |
| Vel               | 3,00  | 1,53  | -0,69  | -6,08 | 3,96   | 4,33  | 10,47   | 9,23  |
| T+Vel             | -0,15 | 0,44  | 0,25   | 2,02  | 0,24   | 0,11  | 3,59    | 3,59  |
| K                 | -2,79 | -3,31 | -0,93  | -2,47 | -1,48  | -1,22 | -0,82   | -0,63 |
| corrMP2           | -     | -0,50 | -      | -1,04 | -      | -0,79 | -       | -0,80 |
| total E0          | -2,94 | -2,88 | -0,68  | -0,45 | -1,24  | -1,10 | 2,77    | 2,95  |
| total E (MP2)     | -     | -3,38 | -      | -1,49 | -      | -1,89 | -       | 2,15  |
| total E (CCSD(T)) | -     | -3,41 | -      | -1,30 | -      | -1,85 | -       | 2,16  |

| Ax - Eq           | F-THP |       | CN-THP |       | OH-THP |       | NH2-THP |       |
|-------------------|-------|-------|--------|-------|--------|-------|---------|-------|
|                   | HF    | MP2   | HF     | MP2   | HF     | MP2   | HF      | MP2   |
| T                 | -0,61 | -2,49 | 0,61   | 5,66  | 0,78   | -1,51 | -4,22   | -6,26 |
| Vel               | 0,69  | 2,14  | 0,17   | -3,28 | 0,92   | 2,56  | 8,77    | 10,31 |
| T+Vel             | 0,08  | -0,34 | 0,78   | 2,38  | 1,70   | 1,05  | 4,56    | 4,05  |
| K                 | -2,94 | -2,45 | -1,31  | -2,69 | -2,58  | -1,82 | -1,58   | -0,98 |
| corrMP2           | -     | -0,62 | -      | -1,01 | -      | -0,55 | -       | -0,35 |
| total E0          | -2,85 | -2,79 | -0,53  | -0,31 | -0,88  | -0,77 | 2,98    | 3,07  |
| total E (MP2)     | -     | -3,41 | -      | -1,32 | -      | -1,32 | -       | 2,73  |
| total E (CCSD(T)) | -     | -3,44 | -      | -1,08 | -      | -1,30 | -       | 2,73  |

$\Delta E_{\text{tot}}$  (MP2) (yellow line) is governed by  $\Delta K$  values (cyan lines).

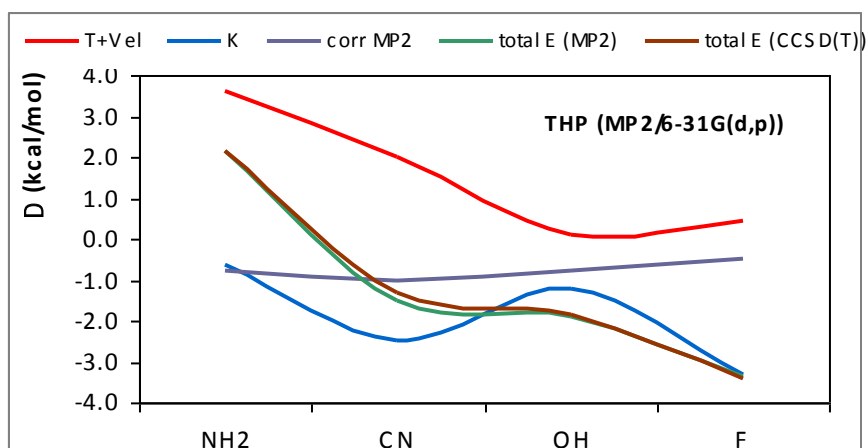

$\Delta K$ ,  $\Delta T + \Delta V_{\text{el}}$  and  $\Delta E_{\text{tot}}$  anomeric difference, as a function of the substituent in 2-THP rings.

## 6. Influence on the basis set type on the anomeric effect calculations

### 2F-THP

|             |      | T          | VNe          | V <sub>NN</sub> | J          | K          | Total E     |
|-------------|------|------------|--------------|-----------------|------------|------------|-------------|
| 4-31G(d,p)  | F(A) | 366.419780 | -1552.976427 | 343.394182      | 522.179166 | -47.563231 | -368.546530 |
|             | F(E) | 366.419363 | -1542.418193 | 338.214888      | 516.800036 | -47.557745 | -368.541650 |
| 6-31G(d,p)  | F(A) | 368.477376 | -1554.328332 | 342.856451      | 521.741345 | -47.645838 | -368.898999 |
|             | F(E) | 368.482768 | -1544.325443 | 337.951589      | 516.638205 | -47.641424 | -368.894305 |
| 6-311G(d,p) | F(A) | 368.995713 | -1555.243816 | 343.027655      | 521.911706 | -47.671732 | -368.980475 |
|             | F(E) | 368.996509 | -1545.345153 | 338.174021      | 516.867480 | -47.668629 | -368.975771 |
| cc-vDZP     | F(A) | 368.909229 | -1554.696056 | 342.865721      | 521.663932 | -47.652190 | -368.909363 |
|             | F(E) | 368.920798 | -1545.115892 | 338.167869      | 516.770706 | -47.648038 | -368.904558 |
| cc-vTZP     | F(A) | 368.888863 | -1556.687801 | 343.766692      | 522.702912 | -47.691779 | -369.021114 |
|             | F(E) | 368.884650 | -1546.783484 | 338.907443      | 517.661020 | -47.687037 | -369.017408 |

### 2-OH THP

|             |       | T          | VNe          | V <sub>NN</sub> | J          | K          | Total E     |
|-------------|-------|------------|--------------|-----------------|------------|------------|-------------|
| 4-31G(d,p)  | OH(A) | 342.418392 | -1495.068181 | 344.025040      | 510.136188 | -46.083726 | -344.572288 |
|             | OH(E) | 342.417704 | -1485.846648 | 339.500562      | 505.439240 | -46.080915 | -344.570058 |
| 6-31G(d,p)  | OH(A) | 344.499740 | -1496.705584 | 343.622847      | 509.850804 | -46.171375 | -344.903569 |
|             | OH(E) | 344.505707 | -1487.738078 | 339.220729      | 505.279079 | -46.169034 | -344.901596 |
| 6-311G(d,p) | OH(A) | 345.002118 | -1497.522406 | 343.732185      | 510.014110 | -46.202776 | -344.976768 |
|             | OH(E) | 345.003136 | -1488.673457 | 339.389485      | 505.505819 | -46.199943 | -344.974961 |
| cc-vDZP     | OH(A) | 344.899446 | -1497.317060 | 343.737216      | 509.951280 | -46.183413 | -344.912531 |
|             | OH(E) | 344.911400 | -1488.538618 | 339.421948      | 505.476716 | -46.182094 | -344.910647 |
| cc-vTZP     | OH(A) | 344.882335 | -1498.444073 | 344.221617      | 510.544197 | -46.218575 | -345.014499 |
|             | OH(E) | 344.886855 | -1489.782015 | 339.967951      | 506.129035 | -46.215349 | -345.013523 |

All values were obtained from geometry optimization calculations performed for each basis set. Only the most stable rotamers of each anomer were considered for 2-OH THP compound.

**8. Absolute values for C5-O5, O5-C1 and C1-X bond lengths in 2-F, 2-CN and 2-OH THP compounds, in Å.**

| X substituent   | C5-O5 (in THF) |       | O5-C1 (in THF) |       | C1-X (in THF) |       |
|-----------------|----------------|-------|----------------|-------|---------------|-------|
|                 | A              | E     | A              | E     | A             | E     |
| F               | 1.415          | 1.407 | 1.368          | 1.379 | 1.373         | 1.351 |
| CN              | 1.414          | 1.409 | 1.391          | 1.394 | 1.494         | 1.479 |
| OH              | 1.411          | 1.404 | 1.393          | 1.398 | 1.392         | 1.377 |
| NH <sub>2</sub> | 1.402          | 1.402 | 1.413          | 1.412 | 1.437         | 1.427 |
